# Supplementary material for: Prevalence of Gastroesophageal Reflux in Cats During Anesthesia and Effect of Omeprazole on Gastric pH
Source: PubMed Central journal article supplement — J Vet Intern Med. 2017 Apr 19;31(3):734–42. doi: 10.1111/jvim.14704 (PMC5435072; doi:10.1111/jvim.14704), 2017-04-19
Supplement: JVIM-31-734-s001.pdf [file JVIM-31-734-s001.pdf]

**Supplemental Table 1**

Table illustrating the mean esophageal and gastric pH, and the frequency, type, and height of the reflux events in 9 of 27 apparently healthy cats that had  $\geq 1$  reflux event during anesthesia for an elective dental procedure.

| Cat | Treatment | Procedure Time (min) | Esophageal pH (Mean) | Gastric pH (Mean) | Total Number Reflux Events | Number of Strongly Acidic Reflux Events | Height of Strongly Acidic Reflux Events Above GEJ (cm) | Number of Weakly Acidic Reflux Events | Height of Weakly Acidic Reflux Events Above GEJ (cm) | Number of Uncharacterized Reflux Events | Height of Uncharacterized Reflux Events Above GEJ (cm) |
|-----|-----------|----------------------|----------------------|-------------------|----------------------------|-----------------------------------------|--------------------------------------------------------|---------------------------------------|------------------------------------------------------|-----------------------------------------|--------------------------------------------------------|
| 1   | P         | 94                   | 6                    | 2.6               | 3                          | 0                                       |                                                        | 3                                     | 5, 5, >9                                             | 0                                       |                                                        |
| 2   | P         | 231                  | 5.9                  | 1.8               | 2                          | 1                                       | 3.5                                                    | 1                                     | 5                                                    | 0                                       |                                                        |
| 3   | P         | 149                  | *                    | *                 | 1                          | *                                       |                                                        | *                                     | *                                                    | 1                                       | 3                                                      |
| 4   | P         | 238                  | 3.8                  | 3.6               | 1                          | 1                                       | >9                                                     | 0                                     |                                                      | 0                                       |                                                        |
| 5   | P         | 124                  | 6.1                  | 4.1               | 1                          | 0                                       |                                                        | 1                                     | 8                                                    | 0                                       |                                                        |
| 6   | P         | 186                  | 3.9                  | 1.3               | 1                          | 1                                       | 3.5                                                    | 0                                     |                                                      | 0                                       |                                                        |
| 7   | P         | 164                  | 5.7                  | 3.2               | 1                          | 0                                       |                                                        | 1                                     | 3.5                                                  | 0                                       |                                                        |
| 8   | O         | 139                  | *                    | *                 | 1                          | *                                       |                                                        | *                                     | *                                                    | 1                                       | 3                                                      |
| 9   | O         | 113                  | *                    | *                 | 3                          | *                                       |                                                        | *                                     | *                                                    | 1                                       | 5, 8, >9                                               |

P = placebo

O = omeprazole

GEJ = gastroesophageal junction

\*= invalidated pH measurement due to drying of the pH sensor
